# 1 Analysis of Mouse Vocal Communication 2 (AMVOC): A deep, unsupervised method for 3 rapid detection, analysis, and classification of 4 ultrasonic vocalizations

5 Vasiliki Stoumpou<sup>a</sup>, César D. M. Vargas<sup>b</sup>, Peter F. Schade<sup>b,c</sup>, Theodoros Giannakopoulos<sup>d</sup>, Erich D. Jarvis<sup>b,e</sup>

<sup>a</sup>School of Electrical and Computer Engineering, National Technical University of Athens, Athens, Greece; <sup>b</sup>Laboratory of Neurogenetics of Language, The Rockefeller University, New York, New York; <sup>c</sup>Laboratory of Neural Systems, The Rockefeller University, New York, New York; <sup>d</sup>Computational Intelligence Lab, Institute of Informatics and Telecommunications, National Center of Scientific Research "Demokritos", Athens, Greece; <sup>e</sup>Howard Hughes Medical Institute, Chevy Chase, Maryland;

## Correspondence:

6 VS: [vassilina.stoumpou@gmail.com](mailto:vassilina.stoumpou@gmail.com), CDMV: [cvargas@rockefeller.edu](mailto:cvargas@rockefeller.edu), PFS: [pschade@rockefeller.edu](mailto:pschade@rockefeller.edu),

7 TG: [tyiannak@gmail.com](mailto:tyiannak@gmail.com), EDJ: [ejarvis@rockefeller.edu](mailto:ejarvis@rockefeller.edu)

---

9 **Abstract** Some aspects of the neural mechanisms underlying mouse ultrasonic vocalizations (USVs) are a useful model for the  
10 neurobiology of human speech and speech-related disorders. Much of the research on vocalizations and USVs is limited to offline  
11 methods and supervised classification of USVs, hindering the discovery of new types of vocalizations and the study of real-time free  
12 behavior. To address these issues, we developed AMVOC (Analysis of Mouse VOcal Communication) as a free, open-source  
13 software to analyze and detect USVs in both online and offline modes. When compared to hand-annotated ground-truth USV data,  
14 AMVOC's detection functionality (both offline and online) has high accuracy, and outperforms leading methods in noisy conditions,  
15 thus allowing for broader experimental use. AMVOC also includes the implementation of an unsupervised deep learning approach  
16 that facilitates discovery and analysis of USV data by clustering USVs using latent features extracted by a convolutional autoencoder  
17 and is implemented in a graphical user interface (GUI), also enabling user's evaluation. These results can be used to explore the vocal  
18 repertoire space of the analyzed vocalizations. In this way, AMVOC will facilitate vocal analyses in a broader range of experimental  
19 conditions and allow users to develop previously inaccessible experimental designs for the study of mouse vocal behavior.

---

## 21 Introduction

22 Over the past two decades there has been a growing interest in the usage and signaling of vocalizations in mice, with large efforts going  
23 into studying the underlying neurobiological mechanisms for auditory processing (*Pomerantz et al., 1983; Liu et al., 2003; Neilans*  
24 *et al., 2014; Perrodin et al., 2020; Holy and Guo, 2005*), and the production of vocalizations (*Arriaga et al., 2012; Chabout et al.,*  
25 *2016; Okobi et al., 2019; Zimmer et al., 2019; Gao et al., 2019; Tschida et al., 2019; Michael et al., 2020*). The tools available for  
26 experiments in mice provide a promising model for studying the neural basis of vocalizations, as well as the effects of genes on the  
27 origin and development of vocal and neural anatomy (*Grimsley et al., 2011; Bowers et al., 2013; Chabout et al., 2016; Tabler et al.,*  
28 *2017*).

29 Mice produce ultrasonic vocalizations (USVs; 30-110kHz) relative to the human hearing range (2-20kHz). Both sexes of mice  
30 produce USVs from an early neonatal age through adulthood (*Grimsley et al., 2011*). Efforts have been made to better understand these  
31 USVs in terms of their structure, classifying their multi-syllabic structure, as well as the non-random sequencing of syllables (*Holy*

32 *and Guo, 2005; Chabout et al., 2016; Calbick et al., 2017; Castellucci et al., 2018; Hertz et al., 2020*). USVs exhibit considerable  
33 variation across inbred strains such that innate USV repertoires can be used as a phenotyping marker for different genotypes (*Melotti*  
34 *et al., 2021*), and as a behavioral readout for genetic modifications and speech related mutations (*Scattoni et al., 2009; Chabout et al.,*  
35 *2016; Castellucci et al., 2016*). USVs can also vary within individuals based on social environment and affective state. For example,  
36 adult male mice are known to modify the temporal organization and the rate of vocalizations for different social contexts (*Chabout*  
37 *et al., 2015*). While we have learned a lot from these behavioral and genetic studies, we still do not know very much about the ways  
38 in which the murine brain generates and processes the content and variation of conspecific USVs. For these reasons, in order to  
39 advance our understanding of the neurobiology of vocalizations, it is equally important to more precisely understand the vocalizations  
40 themselves as units of behavior.

41 Historically, most vocal research was done by hand-annotating spectrograms. Successive technological improvements have led to  
42 many new automated methods that allow for unsupervised detection and classification of vocalizations.

43 These advances in vocal detection include tools developed specifically for analyzing the USV repertoire of mice. Early tools used  
44 supervised classification methods that rely explicitly on the acoustic parameters of the recordings. One such tool is Mouse Song  
45 Analyzer (MSA) (*Holy and Guo, 2005; Arriaga et al., 2012; Chabout et al., 2015*). MSA first generates a spectrogram from the  
46 audio recording, that is subsequently thresholded to remove white noise. Frequencies outside of mouse USV range of 35-125 kHz are  
47 discarded. The spectrogram is used to compute frequency, amplitude, spectral purity, and discontinuity across the entire recording. A  
48 combination of user-defined thresholds for each of these features is used to detect USVs. Lastly a duration filter is applied to remove  
49 any detected sounds that fall below a predefined value, all remaining detections are considered USVs. The detected USVs are then  
50 classified based on the number of gaps, or "pitch jumps", that are present within the detected USVs (*Chabout et al., 2015*). USVSEG  
51 (*Tachibana et al. (2020)*) is also a MATLAB tool used for vocalization detection, emphasizing on noise removal of the spectrogram  
52 in the cepstral domain before thresholding to detect whether a segment contains a vocalization or not. Another tool is Ax (*Neunuebel*  
53 *et al. (2015)*), which seeks to detect vocal signals by keeping time-frequency points of the spectrogram that significantly exceed noise  
54 values.

55 As new methods have arisen for the unsupervised assessment of USVs (*Van Segbroeck et al., 2017*), some have implemented  
56 machine learning and neural networks in their processes (*Coffey et al., 2019; Fonseca et al., 2021*). Machine learning methods have  
57 been used improving detection accuracy, but performance is limited by how well a network is trained, and it may not always generalize  
58 across experiments.

59 This includes Mouse Ultrasonic Profile ExTraction (MUPET), a MATLAB open source tool, developed by *Van Segbroeck et al.*  
60 *(2017)* to detect syllables, analyze the vocalizations features and cluster the syllables depending on these features. MUPET first filters  
61 the signal to keep high frequencies (25-125 kHz). It then uses spectral subtraction to remove stationary noise, and at last it computes  
62 the power of the spectral energy in the ultrasonic range above a specific threshold. The vocalizations are converted to representations  
63 by using negative matrix factorization (NMF) and gammatone filters. The filtered spectrograms are then used to cluster vocalizations  
64 based on spectral shape similarities. The clustering is done by using K-Means, and user-defined number of "repertoire units" (clusters).  
65 The authors note that MUPET can also be used with many non-rodent species' vocalizations.

66 DeepSqueak is a software suite for USVs detection and analysis (*Coffey et al. (2019)*). It splits the recording into areas of interest,  
67 computes the corresponding sonograms and passes them to a Faster-RCNN (recurrent convolutional Neural Network) object detector,  
68 which consists of two networks. The first network is a region detection network, which proposes sections of the spectrogram that  
69 could contain actual vocalizations. These sections are then used as inputs to a second network, a convolutional neural network (CNN),  
70 and are classified depending on whether or not the sections contain vocalizations. This process has been recently updated to use a You  
71 Only Look Once (YOLO) network to improve detection quality. These networks can also be trained on new vocalizations. DeepSqueak  
72 can also be used for clustering the detected syllables, either with a supervised or unsupervised method. Their unsupervised approach  
73 gives the user the opportunity to define three weighted input features: shape, frequency and duration of the vocalization. An important  
74 difference from MUPET is that the clustering function of MUPET takes syllable amplitude into account, whereas DeepSqueak does  
75 not, which can be considered an advantage for DeepSqueak, given that the amplitude of a vocalization can depend on the recording  
76 setup itself, among other factors.

77 VocalMat is a MATLAB tool (*Fonseca et al. (2021)*), which uses image processing techniques and differential geometry analysis  
78 on the spectrogram of a recording to detect vocalization candidates. It can then classify detected USVs into 12 predefined categories  
79 (including noise), by using a CNN. As with DeepSqueak, VocalMat's networks can be retrained as well.

80 A more recent tool is Deep Song Segmenter (DeepSS), which has been used for annotation of songs of mice, birds and flies

81 (*Steinfath et al., 2021*). DeepSS learns a representation of sounds features directly from raw audio recordings using temporal  
82 convolutional networks (TCNs), based on dilated convolutions. It is a comparatively fast, supervised annotation method, since the  
83 network is trained with manually annotated recordings. It can also be combined with unsupervised approaches to reduce the amount  
84 of manual annotation required.

85 There are, however, limitations to each of these approaches. The supervised classification methods, like MSA (*Holy and Guo,*  
86 *2005; Arriaga et al., 2012; Chabout et al., 2015*), limits their utility in being able to analyze datasets for changes or novelty in the  
87 USV repertoire across individuals and genotypes. All methods thus far do not perform analyses in real time. To address these pitfalls,  
88 we sought to create a tool for mouse USVs that is both computationally efficient and accurate, and that can provide a less biased  
89 classification of USVs.

90 In this work we present Analysis of Mouse Vocal Communication (AMVOC), a new open-source tool for mouse USV research.  
91 AMVOC's purpose is twofold: (a) it uses dynamic spectral thresholding to *detect* the presence of USVs in audio recordings (both  
92 offline and online), and (b) similar to other machine learning approaches it analyzes and visualizes the detected USVs using feature  
93 representations extracted from deep convolutional autoencoders, and uses these feature representations for *clustering* and data  
94 exploration. AMVOC's ability to detect USVs has been extensively evaluated using real recordings, and AMVOC's accuracy has  
95 been shown to outperform most state-of-the-art tools in various acoustic environments, allowing for more flexible experimental set  
96 ups. In addition, while many of the other USV detection tools available are specifically developed for offline analysis of vocalizations,  
97 AMVOC is unique in that it can also be used to detect and measure USVs in real-time with an accuracy that rivals the accuracy of  
98 offline approaches and detection speeds at behaviorally relevant timescales. Lastly, the proposed deep feature extraction technique,  
99 using a convolutional autoencoder, produces unsupervised USV classifications that can be used as a basis to discover biologically  
100 relevant USV clusters. This provides an unparalleled usage that opens up new avenues to better understand mouse vocal behavior and  
101 its associated neurobiology.

## 102 **Results**

### 103 **Experimental evaluation of the AMVOC detection method**

104 Our objective was to design and implement a robust (in terms of detection performance) but also computationally efficient USV  
105 detection method, as our vision was to build a real-time, online pipeline. Because of the online vision of the design, we wanted to  
106 ensure that our method could still perform with high accuracy despite the demands of online processing.

107 We compared our proposed detection methodology with several popular USV detection tools, such as MUPET (*Van Segbroeck*  
108 *et al., 2017*), VocalMat (*Fonseca et al., 2021*), and DeepSqueak (*Coffey et al., 2019*). We also wanted to compare our new tool  
109 with MSA, which was developed in our lab. We rewrote MSA, from the original MATLAB implementation (MSA1) to a Python  
110 implementation (MSA2) with added filtering components to improve USV detection rates. We noted that MSA1 was cutting off parts  
111 of beginning of syllables, underrepresenting the full spectral duration of the USV syllables, as well as misrepresenting the timestamps  
112 of the detected USVs. MSA2 first bandpasses the raw audio (30-115 KHz) and then generates a spectrogram. The spectrogram is  
113 thresholded according to the signal-to-noise ratio at each frequency.

114 Due to the vast range of possible parameters that could be tuned in each method we compared against, we used default settings,  
115 unless there were other documented settings that were used (*Chabout et al., 2017*). In order to evaluate and compare the aforementioned  
116 methods, we used Dataset D1, which consists of 9 audio segments of 5-10 seconds each, containing 245 annotated syllables in total  
117 from 14 mice (see Section ).

118 To evaluate the range of experimental contexts recordings could be taken from, we split the recordings into two categories: normal  
119 and noisy. Normal parts of the recording are the ones where the vocalization detection is relatively straightforward, because the energy  
120 easily surpasses the background energy. Noisy parts contain background noise, such as cage bedding or physical interactions between  
121 the mice, any of which makes the detection more difficult and ambiguous, even for the human eye observing the raw spectrograms.  
122 The evaluation metrics are calculated separately for the two categories.

123 For evaluation and comparison we adopted two performance metrics, namely the temporal F1 and the event F1 score:

- 124 • For the *temporal F1 score*, we interpret the vocalization detection as a classification task of each 1 ms time frame into two  
125 categories (vocalization or no vocalization). Then we calculate the precision and recall rates by comparing the detected  
126 vocalizations to the ground-truth vocalizations. Their harmonic mean is the temporal F1 score.
- 127 • The *event F1 score* is the harmonic mean of the two following fractions: (a) the number of events a method detected that are  
128 annotated in the ground-truth data by the number of events detected by a method (i.e. precision), and (b) the number of events

|          |                | AMVOC       |           |      |             |       |           |             |
|----------|----------------|-------------|-----------|------|-------------|-------|-----------|-------------|
| F1 score |                | offline     | online    | MSA1 | MSA2        | MUPET | VocalMat  | DeepSqueak  |
| Temporal | Normal         | 84          | 85        | 46   | 88          | 85    | <b>91</b> | 83          |
|          | Noisy          | 67          | 68        | 23   | 71          | 53    | 57        | <b>76</b>   |
|          | <b>Average</b> | 75.5        | 76.5      | 34.5 | <b>79.5</b> | 69    | 74        | <b>79.5</b> |
| Event    | Normal         | <b>97</b>   | <b>97</b> | 66   | 94          | 93    | 90        | 93          |
|          | Noisy          | <b>84</b>   | 83        | 33   | 72          | 57    | 58        | 81          |
|          | <b>Average</b> | <b>90.5</b> | 90        | 49.5 | 83          | 75    | 74        | 87          |

**Table 1.** F1 scores of our proposed method and other methods.

129 annotated in ground-truth data that are detected with a method by the number of events of ground-truth annotations (i.e. recall).

| Methods    | Real-time Processing Ratio |
|------------|----------------------------|
| MUPET      | <b>32.4</b>                |
| MSA2       | 29.9                       |
| MSA1       | 28.1                       |
| AMVOC      | 21.2                       |
| DeepSqueak | 8.2                        |
| VocalMat   | 4.3                        |

**Table 2.** Real-time Processing Ratio of all compared methods. Real-time processing ratio is defined as  $rt = \frac{\text{duration of the recording}}{\text{processing time}}$  and is shown for each method. The processing time is calculated as the time needed to just detect the USVs. The experiments carried out to compute the real-time ratio were executed for 5 different recordings, 3 times for each, and the average time for each method was calculated. Obviously, a high real-time processing ratio means that a small processing time is required in order to detect the vocalizations of a certain signal (e.g.  $rt = 30$  means that the respective method is 30 times faster than real-time, meaning it takes 1 minute to process 30 minutes of audio information).

130 Using Dataset D1, we found that AMVOC outperforms the other methods with respect to event F1 score, both in clean and noisy  
 131 segments of the recordings, whereas MSA2 and DeepSqueak performed slightly better than the others with respect to temporal F1  
 132 score (Table 1), largely due to the more successful detection in the noisy parts of the recordings.

133 We also assessed the trade-off between processing speed and detection by determining the processing ratio for AMVOC and  
 134 each method we compared to (Table 2). This metric provides an assessment of how quickly a method is able to process a batch  
 135 of audio data, which is important for considering the feasibility of real-time processing. AMVOC had an intermediate real-time  
 136 processing ratio to detect the vocalizations (Table 2). MUPET was the fastest method, whereas VocalMat and DeepSqueak were the  
 137 slowest (Table 2). The reason for the latter two methods being slower is likely due to their image processing steps used to detect  
 138 USVs. It is also meaningful that we take into account both of the two aforementioned metrics, since it may be important for particular  
 139 experimental requirements that a certain method combines accurate and fast detection. We compared the average F1 score with the  
 140 real-time Processing Ratio for both temporal and event F1 scores (Figure 1A and B). AMVOC and DeepSqueak achieved the highest  
 141 temporal and event F1 score, but AMVOC had a considerably better time performance relative to DeepSqueak. While both AMVOC  
 142 and DeepSqueak were the most accurate overall, AMVOC performed better in segments where noise energy was near that of the  
 143 USVs (Figure 1C).

144 To mitigate bias in our evaluation of AMVOC, we also compared AMVOC with the Dataset published alongside VocalMat  
 145 (hereafter referred to as VM1) by *Fonseca et al. (2021)*. VM1 consists of 7 different recordings from 7 mice (5-15 days old, of both  
 146 sexes) (*Fonseca et al., 2021*). We did not change AMVOC's pre-determined configuration (parameters  $t$  and  $f$ ) for this evaluation, in  
 147 order to examine how robust the selection of  $t$  and  $f$  is for recordings produced in different conditions.

148 The recordings of VM1 contain a constant noise artifact at 30 kHz, to remove unwanted distortions we used a high pass filter  
 149 with a higher cut-off frequency than before (45 kHz). By implementing a 45 kHz cut-off, the new range we examined for detection  
 150 in VM1 was between 45 and 110 kHz, instead of 30-110 kHz. Because the ground truth annotations by *Fonseca et al. (2021)* only

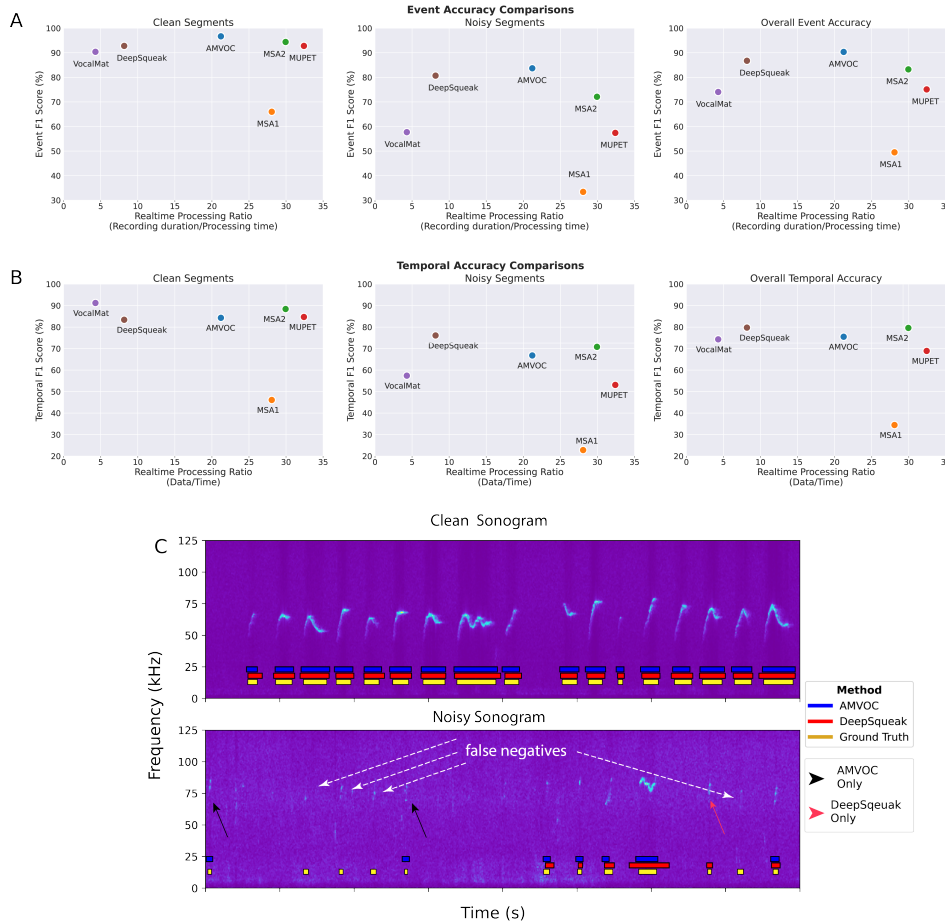

**Figure 1.** Accuracy of AMVOC and Other Methods A-B) Event and temporal accuracy of different USV detection methods compared against our ground truth data in different qualities of recordings. C) Examples of the two highest performing methods, AMVOC and Deepsqueak, on clean (top) and noisy (bottom) segments of USV recordings. Contrast modified to facilitate visualization in the noisy spectrogram.

151 declare the start time of each vocalization, we examined start times of the different methods compared to ground truth start times with  
 152 20 ms tolerance, similar to what Fonseca et al. used in their assessment of VocalMat vs DeepSqueak. We also considered a ground  
 153 truth vocalization as "found" when the ground truth start time was between the start and end time of a detected vocalization (in case  
 154 some method merged successive vocalizations). Since we only have ground truth start times, we only used event and not temporal  
 155 evaluation. We calculated precision, recall and F1-score of VMI detection results as we had done with Dataset D1, for each of the  
 156 seven recordings separately, and then their mean.

157 The detected vocalizations of VocalMat are taken from *Fonseca et al. (2021)*, whereas we ran the experiments with MUPET,  
 158 DeepSqueak and, of course, AMVOC.

| Methods       | Event F1-score (%)   |
|---------------|----------------------|
| AMVOC offline | 95.6 (+/- 2.5)       |
| AMVOC online  | 93.6 (+/- 3.8)       |
| VocalMat      | <b>98.5 (+/-0.6)</b> |
| MUPET         | 76.0 (+/-10.2)       |
| DeepSqueak    | 85.1 (+/-3.8)        |

**Table 3.** Event F1-score of all methods. All measurements provided as mean and standard error of the mean (SEM) from  $n = 7$  samples (recordings).



159 Without tuning on this specific dataset, AMVOC (both offline *and* online) achieved the best results compared to the other methods  
160 except for VocalMat (Table 3). Notably, VocalMat's detection method is trained on data similar to test data from Dataset VM1, so  
161 high detection quality by VocalMat on their own data is expected.

## 162 Experimental evaluation of the AMVOC clustering method

163 After evaluating the segmentation and detection performance of AMVOC we wanted to develop a way to assess the repertoire  
164 composition of the USVs. To do so, we developed an autoencoder approach (see Section ) whereby latent features are extracted from  
165 images of detected USVs, transformed, and then clustered for manual inspection and evaluation (Figure 2). Although others have  
166 shown autoencoders can extract relevant information about an individual mouse's vocalizations (*Goffinet et al., 2021*), similarly, we  
167 wanted to ensure that the autoencoder we designed could capture features of USVs that may not be obviously calculated or discerned  
168 relative to what could be obtained from simple feature descriptions that are often used for comparing USVs of different mice.

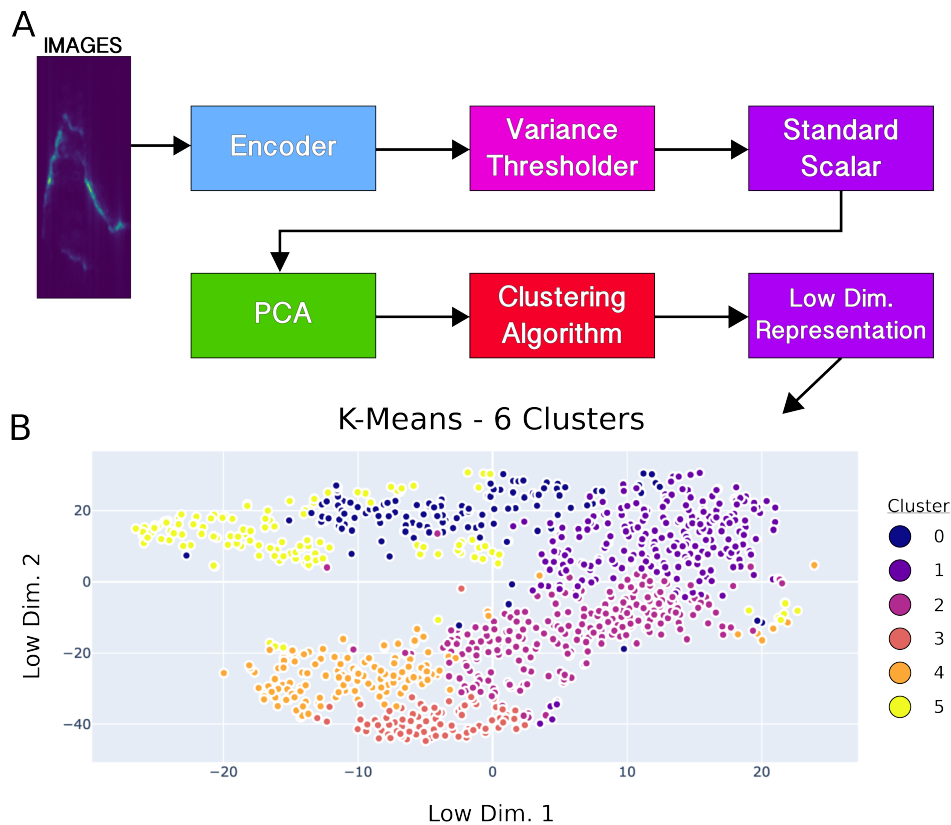

**Figure 2.** Overview of deep feature extraction procedure. A) Flow diagram of the general procedures used to take image data from USV spectrograms into clusters. B) Cluster example using deep features with K-Means clustering and 6 clusters.

169 Our primary goal is to compare the deep feature extraction method (see Section ) to the baseline feature extraction method using  
170 hand-picked features (e.g. bandwidth, duration, frequency max, and frequency min) (described in methods Section ). We compared  
171 these two feature extraction approaches by evaluating the derived clustering of the two kinds of features. We evaluated how well  
172 the different clustering methods perform in grouping vocalizations with common features. To achieve these two goals, we used  
173 data from four different annotators, two of whom are domain experts, and the other two are not. By using the AMVOC GUI, each  
174 annotator evaluated the 4 recordings from Dataset D3, which were generated by selecting segments of 72 different recordings ( ).  
175 The annotators evaluated 3 different clustering configurations for each recording: Agglomerative clustering with 6 clusters, Gaussian  
176 Mixture clustering with 6 clusters and K-Means clustering with 6 clusters.

177 In order to ensure impartiality and objectivity, the annotators evaluated the clustering derived from both feature extraction methods  
178 (named as Method 1 for deep features and Method 2 for hand-picked features), without prior knowledge of which Method refers to the  
179 deep features or the hand-picked (simple). Using a scale from 1 to 5, 5 being the best, the evaluation metrics used are the following:

- 180 1. Global annotations: The annotator defines a score to describe how successful the whole clustering is.  
 181 2. Cluster annotations: The annotator defines a score to describe how successful each cluster is.  
 182 3. Point annotations: The annotator selects points from different clusters and declares whether they should be approved or  
 183 rejected in the specific cluster to which they have been assigned. Approximately 100 points were annotated by each user per  
 184 configuration, for each method.

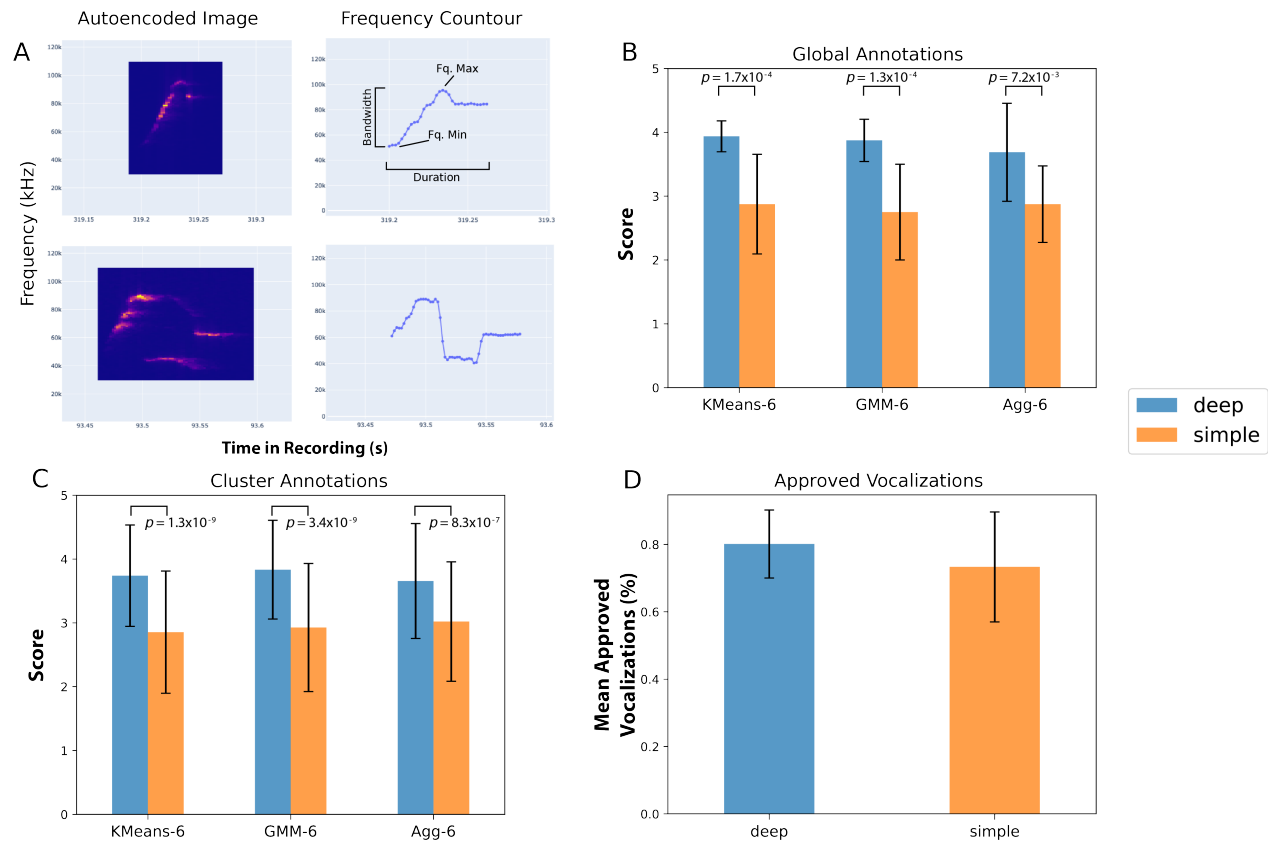

**Figure 3.** Global and cluster annotation evaluations. A) Examples of two vocalizations with the autoencoder image generated from deep feature extraction (left column) and the peak energy countour used for hand-picked feature extraction (right column). Mean and standard deviation (error bars) of the scores assigned in each configuration for all files evaluated by the annotators for B) the global clustering scores and C) for each cluster in each configuration. D) Mean percentage of approved vocalizations for point annotation evaluation.  $p$ -values in C and D determined by Student's  $t$ -test.

185 First we evaluated the global annotations (Figure 3B). For each annotator  $i$ , we calculated the mean score  $\mu$  of each clustering  
 186 configuration  $s$  (KMeans-6, GMM-6, Agg-6), using the scores from the 4 recordings:

$$\mu_{i,s} = \frac{1}{4} \sum_{j=1}^{j=4} G_{i,s,j} \quad (1)$$

187 where counter  $j$  refers to the 4 recordings and  $G_{i,s,j}$  is the global score of each configuration  $s$ , in recording  $j$ , set by annotator  $i$ . Then,  
 188 the mean  $m$  and standard deviation  $d$  of these mean scores of the 4 users is calculated (Figure 3B).

$$m_s = \frac{1}{N_a} \sum_{i=1}^{i=N_a} \mu_{i,s} \quad (2)$$

189

$$d_s = \sqrt{\frac{1}{N_a} \sum_{i=1}^{i=N_a} (\mu_{i,s} - m_s)^2} \quad (3)$$

190 where  $N_a$  is the number of annotators (in our case, 4).

191 Based on the annotation results, deep feature extraction yields better clustering results than simple feature extraction, with the three  
192 configurations used in this test (Figure 3B). All pairs of annotation scores were statistically significant (Student's  $t$ -test; K-Means,  $t=$   
193  $5.0$ ,  $p= 1.7 \cdot 10^{-4}$ ; GMM,  $t= 5.1$ ,  $p= 1.3 \cdot 10^{-4}$ , Agg,  $t= 3.1$ ,  $p= 7.2 \cdot 10^{-3}$ ). The configuration does not seem to affect the performance  
194 of the clustering very much, as far as the mean values are concerned.

195 Next we looked at the cluster annotations scores (Figure 3C). For each configuration and annotator, we calculated the mean scores  
196  $\mu'$  of all the 6 clusters in the 4 recordings:

$$\mu'_{i,s} = \frac{1}{4 \cdot c_s} \sum_{j=1}^{j=4} \sum_{k=1}^{k=c_s} C_{i,s,j,k} \quad (4)$$

197 where counter  $j$  refers to the 4 recordings,  $k$  to the number of clusters of each configuration  $c_s$  (in our case, 6 for all configurations)  
198 and  $C_{i,s,j}$  is the cluster specific score of cluster  $k$  of configuration  $s$ , in recording  $j$ , set by annotator  $i$ .

199 These mean scores were then used to calculate the mean and standard deviation values ( $m'$  and  $d'$  respectively) for each  
200 configuration:

$$m'_s = \frac{1}{N_a} \sum_{i=1}^{i=N_a} \mu'_{i,s} \quad (5)$$

201

$$d'_s = \sqrt{\frac{1}{N_a} \sum_{i=1}^{i=N_a} (\mu'_{i,s} - m'_s)^2} \quad (6)$$

202 where  $N_a$  is the number of annotators (in our case, 4). The results of the cluster-level annotation scores were consistent with  
203 the ones from the global annotation scores (Figure 3). As with global scores, all cluster annotation comparisons showed significant  
204 differences between deep and simple feature annotations (Student's  $t$ -test; K-Means,  $t= 6.7$ ,  $p= 1.3 \cdot 10^{-9}$ ; GMM,  $t= 6.5$ ,  $p= 3.4 \cdot 10^{-9}$ ,  
205 Agg,  $t= 5.3$ ,  $p= 8.3 \cdot 10^{-7}$ ).

206 We then assessed the percentage of vocalizations each user approved for each cluster based on their unsupervised assignment  
207 for both deep and simple methods (Figure 3D). If we denote the approved vocalizations of user  $i$  as  $a_i$ , and the total vocalization  
208 annotations they have made as  $t_i$ , then the mean percentage of approved vocalizations is calculated as:

$$M = \frac{1}{N_a} \sum_{i=1}^{N_a} \frac{a_i}{t_i} \quad (7)$$

209 It is clear that users more frequently approved vocalizations clustered by the deep feature extraction method (Figure 3D).

210 Overall, the deep feature extraction method outperforms the simple method in all terms:

- 211 • Global clustering evaluation was 37% higher than the simple approach (Figure 3B)
- 212 • Cluster-specific evaluation was on average 30% higher than the simple approach (Figure 3C)
- 213 • Average point-level evaluation was 10% higher than the simple approach (Figure 3D)

214 This suggests that the encoder has indeed retrieved useful information of each image, resulting in feature vectors that enable a  
215 better clustering of the vocalizations based on visually discernible features.

216 Further, this indicates that there are much more complex similarities and differences between vocalizations carried by the  
217 representations extracted from the encoder than what is available from hand-picked features.

## 218 Discussion

219 In this paper we have presented Analysis of Mouse Vocal Communication (AMVOC), an open-source tool for detecting and analyzing  
220 mice ultrasonic vocalizations. A robust USV detection methodology has been presented and evaluated against a real dataset and  
221 results have demonstrated that it is as accurate (and in some cases more accurate) as state-of-the-art tools, while still being fast enough  
222 to feasibly function in real-time conditions.

223 Apart from accurately detecting USVs, AMVOC includes a novel unsupervised approach for representing and grouping the  
224 USVs' content using convolutional autoencoders. We have presented a human annotation procedure for evaluating the ability of the  
225 proposed representation technique to discriminate between different types of USVs. Results show that the proposed deep feature  
226 extraction method outperforms simple hand-picked features in clustering USVs that are more similar to one another (>30% in global-  
227 and cluster-level annotations), leading to possibly meaningful and homogeneous clusters.



228 This methodology sets a new context for automatic content characterization of mouse vocalizations, according to which clusters of  
229 similar vocalizations can be automatically "learnt" through deep neural network architectures. While others have used autoencoders to  
230 analyze mouse USVs (*Goffinet et al., 2021*), these methods were not designed to allow users to explore the deep feature clustering  
231 and evaluate the results themselves.

232 In addition to the functionalities and usage modes mentioned, the Dash app in which AMVOC runs provides the user with the  
233 ability to save the current clustering configuration, along with other user-friendly functionalities. For example, the user can save the  
234 feature vectors and the corresponding clusters of every vocalization, and then use them as ground truth data to train a classifier. By  
235 using the automatically extracted vocalization clusters (from the proposed unsupervised pipeline) as classes to train a supervised  
236 model, users can then load the model in a real-time and online behavioral context to classify discovered syllables immediately after  
237 the vocalizations are detected. This workflow provides a previously inaccessible way to evaluate mouse USV behavior, and opens  
238 the door for many real-time, closed-loop behavioral assessments by uniquely utilizing the proposed semisupervised approach. A  
239 future direction of the present work is the application of semisupervised methodologies in USVs clustering. The goal would be to  
240 integrate human interventions in the classifier used for detection (either offline or online). This could include alternative clusters with  
241 reassigned labels for missclustered USVs or comparing pairs of vocalizations, which can be used as pairwise constraints to retrain the  
242 encoder part of the model, thus improving subsequent clustering outcomes. These retrained models and new classifications could  
243 provide many new opportunities for approaches such as operant behavior, or new types of experiments in mouse vocal research that  
244 were previously inaccessible with current methodologies.

245 While much of the work discussed here and by others focuses on descriptions and characterizations of single USVs, applying  
246 these techniques to sequences of USVs could yield a more detailed understanding of rodent vocal behavior. Further development of  
247 methods like AMVOC at a sequence-level could provide ways to examine the temporal relationship between syllables across bouts of  
248 vocal behavior. It has been known since mouse USVs were first identified as "songs" (*Holy and Guo, 2005*) that across the timescale  
249 of a recording session mice will use similar sequences of vocalizations. There have been some attempts to describe the extent to which  
250 USV sequencing can be considered patterned (*Chabout et al., 2015, 2016*), but these analyses have focused on pairwise changes in  
251 sequencing (i.e. how one syllable type follows or precedes another). We propose that future analyses would be best approached at  
252 varying timescales and syllable sequence dimensions. By doing so, sequences of vocalizations could be processed and studied, so  
253 they can be connected and correlated with various behaviors in mice with a broader appreciation of vocal behavior.

254 Improvements in, and increased access to high-capacity computing resources that are user friendly and scalable has led to an  
255 explosion of resources being developed to measure as many features of animal behavior as is possible (*Datta et al., 2019; von Ziegler  
256 et al., 2021; Hausmann et al., 2021*). These resources have become invaluable as neuroscientists push to understand behaviors in  
257 more naturalistic contexts. Such unrestrained behaviors can allow for more flexible experimentation and a deeper understanding  
258 of ethologically relevant brain function, or clinically relevant behavioral changes (*Jones et al., 2020*). One way that this has been  
259 approached in most behavioral experiments is to use markerless animal tracking or pose estimation of single or multi-animal contexts  
260 (*Kabra et al., 2013; Mathis et al., 2018; Gal et al., 2020; Marshall et al., 2021; Hsu and Yttri, 2021*). As with mouse USV analyses,  
261 many of these methods remain offline, with some notable exceptions providing low-latency feedback for behavioral experimentation  
262 (*Kane et al., 2020*). Following in the footsteps of increased data capture and processes that facilitate real-time event detection in  
263 animal behavior, AMVOC sets a new standard for vocally-driven analysis of mice behavior.

## 264 **Materials and Methods**

### 265 **Laboratory setup and dataset**

266 We used recordings from two sources: recordings used to develop AMVOC were taken from *Chabout et al. (2015)*, recorded at Duke  
267 University. The recordings are publicly available on mouseTube(*Torquet et al., 2016*). These recordings were captured at 250 kHz.  
268 Other recordings used in this study are derived from behavioral experiments detailed below.

### 269 **Animals**

270 Adult C57BL/6J mice were purchased from Jackson Laboratory and a colony was bred and maintained at The Rockefeller University.  
271 Before recording experiments, all mice were group housed (2–5 per cage) and kept on a 12-h light/dark cycle, and received ad-libitum  
272 food and water. All procedures were approved by the Institutional Animal Care and Use Committee of The Rockefeller University.

## 273 Behavioral Recordings

274 Adult male and female mice were used in this study. We used procedures similar to those previously described by Chabout et al.  
275 (2015, 2016, 2017). Briefly, before being used for recordings, adult male mice (>8 weeks old) were sexually socialized overnight  
276 with a sexually mature female mouse. The next morning, the female mouse was removed and returned to her home cage. For  
277 subsequent exposures, when eliciting female-directed ultrasonic vocalizations, different females were used than the one used for  
278 sexual socialization. Prior to the vocal recording experiments, the experimental male was removed from their home cages and  
279 acclimated in a clean cage inside the recording chamber for 10 minutes. After this acclimation period, either an adult female mouse  
280 was introduced into the cage with the male (recordings referred to as FemaleLiveDirected), or urine from a female mouse was placed  
281 in the cage (recordings referred to as FemaleUrineDirected). After the female or urine stimulus was introduced, the recording was  
282 started. Recording sessions lasted up to 5 minutes. After the recording period was completed, the animals were returned to their  
283 home cages. The recording chamber is a 15" × 24" × 12" beach cooler which acts as an acoustically insulated environment. No  
284 lighting was provided inside the cooler, as mice are nocturnal and vocalize more in the dark. A microphone was hung from the top of  
285 the chamber, placed ~15cm from the bottom of the cage. Some recordings were intentionally noisy in order to increase the spectral  
286 energy in lower frequencies, thus challenging the detection capacity of AMVOC and other methods. For these "noisy recordings",  
287 we used clean cages containing a bedding of Corn Cob (Lab Supply, Fort Worth, TX) or Cellu-nest™ (Shepherd Specialty Papers,  
288 Watertown, TN). For real-time detection, we used an Ultramik 384K BLE (Dodotronics, Italy), sampling at 384kHz, connected to  
289 a Raspberry Pi 4 Model B (8GB RAM), and monitored vocalizations via live sonograms using the UltraSoundGate CM16/CMPA  
290 recording system (Avisoft Bioacoustics®, Berlin, Germany).

## 291 Datasets

292 In the course of our experimental and evaluation procedures, we created three datasets (D1, D2 and D3).

293 Dataset D1 was created to evaluate and compare vocalization detection methods. Specifically, we compiled a ground-truth dataset  
294 of 9 audio segments of 5-10 seconds each, containing 245 syllables in total from 14 different mice. The ground-truth annotation was  
295 performed by a domain expert by simply declaring the frames that correspond to actual vocalizations, with a time resolution of 1 ms.  
296 The recordings used, along with the annotations and instructions on how to reproduce the results, is openly available and can be found  
297 in the AMVOC repository <https://github.com/tyiannak/amvoc/tree/master>.

298 Dataset D2 consists of 26 different recordings from 9 different mice, used as the training set of our convolutional autoencoder,  
299 explained in Section . These recordings can be found under <https://drive.google.com/drive/folders/14l-zJmXcjSR9cucnq8lwmU>  
300 <https://drive.google.com/drive/folders/1M976oaxiMpEffN9dfm5Kd5kHeGliNhbw>.

301 Dataset D3 was created for the experimental evaluation of the clustering configurations (explained in Section ). We used a dataset  
302 of 72 behavioral recordings, explained in , 36 in the category FemaleUrineDirected and 36 in the category FemaleLiveDirected.  
303 These recordings come from 12 different mice. We have randomly selected 20 s from each recording, where the vocalization rate  
304 should be at least 2.5 vocalizations/sec. We then concatenated the 20 seconds interval from each recording to a new recording. We  
305 generated 4 recordings, 2 from the FemaleUrineDirected category and 2 from the FemaleLiveDirected category. These recordings  
306 can be found under <https://drive.google.com/drive/folders/1l7qUw0SVvd1dzNr35FT7XOxbhxDP7Kqn>.

## 307 Detection of mouse vocalizations

308 The first step of AMVOC's processing pipeline is to detect mice USVs. Given an input recording, we want to determine the parts of  
309 the signal that contain a USV. Below are methods for offline and online detection.

### 310 Offline USV Detection

311 In order to detect the mice USVs, we first compute the spectrogram of the whole recording. This is done by splitting the signal  
312 to non-overlapping short-term windows (frames) of duration  $w = 2$  ms (time resolution) and calculating the Short-Term Fourier  
313 Transform (STFT) for each time frame. Frequency resolution  $f_r$  is calculated as:

$$f_r = \frac{1}{w} \quad (8)$$

314 This means that in our case, if  $w = 2$  ms,  $f_r = 0.5$  kHz. In simple terms, the ability of the 2-dimensional (time & frequency)  
315 spectrogram representation to discriminate between different frequency coefficients is 0.5 KHz (i.e. frequency resolution). This is  
316 less fine-scaled than is typical for human speech analytics methods, but because mice vocalizations usually range in the frequencies  
317 30-110 KHz, this resolution is more than sufficient.

318 As soon as the spectrogram is extracted, the USVs are detected on a time frame-basis, using two separate criteria, time-based  
 319 thresholding (TT) and frequency-based thresholding (FT), that take into account the values of the distribution of the signal's energy at  
 320 the different frequencies (Figure 4A). Both of these criteria are based on the spectral energies, however they differ in the way the  
 321 thresholding criteria are calculated and applied. The details of the two criteria are as follows:

- 322 • Time-based thresholding (TT): This involves a simple temporal thresholding of the spectral energy values. To do this, for each  
 323 time frame, we calculate the spectral energy by summing the energy value at each frequency. We do this procedure for the  
 324 frequency range of interest, which is, as mentioned above, from 30 kHz to 110 kHz. If we denote the spectrogram value at time  
 325 frame  $i$  and frequency  $j$  as  $E_{ij}$ , spectral energy  $S_i$  is calculated as:

$$S_i = \sum_{j=30kHz}^{110kHz} E_{ij} \quad (9)$$

326 where the step of  $j$  is equal to 0.5 kHz. We then compute a dynamic sequence of thresholds for the spectral energy. In particular,  
 327 for each frame  $i$ , for which we have extracted the spectral energy  $S_i$ , we compute the dynamic threshold:

$$T_i = \frac{1}{2} \frac{\sum_{j=0}^{N-1} S_j}{N} + \frac{1}{2} \frac{\sum_{j=0}^{K-1} S_{i-j}}{K} \quad (10)$$

328 where  $N$  is the number of time frames, so the first term refers to the mean spectral energy. In the second term,  $K$  is the size  
 329 of a moving average filter in seconds. Here we use  $K = 2$  seconds, which is convolved with the sequence of spectral energy  
 330 values. In other words, the dynamic threshold  $T_i$  is defined at each frame  $i$  as the average of the current spectral energy ( $S_i$ ) and  
 the moving average of the spectral energies of the last  $K$  frames.

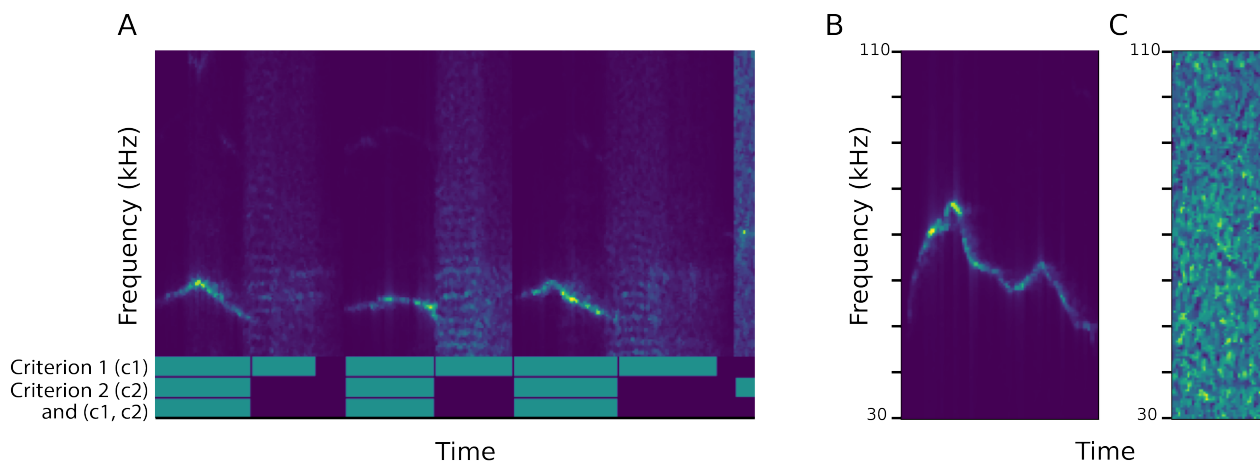

**Figure 4.** Examples of detection criteria. A) Demonstration of the twofold thresholding application. The green bars of the first two lines show the detected vocalizations by each criterion, whereas the third-line green bars are their intersection. Segments were spliced for purposes of visualization. B and C) Examples of two different segments of the spectrogram, from 30-110 kHz. Here, an actual vocalization (B) and a noisy, high-energy segment (C) are displayed. In the noisy segment each time frame surpasses the spectral energy threshold (criterion 1), but not the second applied threshold (criterion 2).

- 331 • Frequency-based thresholding (FT): This second criterion is associated to applying a thresholding rule, based on the per-frame  
 332 distribution of energies on the different frequencies. A simple dynamic threshold at each time frame of the spectrogram (as  
 333 described above) is not enough, because there are also time frames where high spectral energy occurs due to noise. The spectral  
 334 energy value in these high-noise time frames may surpass the threshold, but this does not correspond to any vocalization (Figure  
 335 4B and C). Our goal is to filter out these false positive vocalizations. It is easy to observe that in the vast majority of cases,  
 336 noise appears as high energy values, spread across a large frequency range in each time frame (Figure 4C), compared to the  
 337 time frame energy distribution in vocalizations, which is concentrated in a small frequency range in each time frame (Figure  
 338 4B). Our filtering criterion was to keep only time frames where the peak energy value  $P_i$  is larger than the mean spectral energy  
 339 ( $M_i$ ) of a 60kHz range around the frequency of the peak energy (truncated if the range goes below 30kHz or above 110kHz). If  
 340

we denote the energy value at time frame  $i$  and frequency  $j$  as  $E_{ij}$ , the equations describing the two quantities above, are the following:

$$P_i = \max_{j=30, \dots, 110 \text{ kHz}} E_{ij} \quad (11)$$

$$M_i = \frac{1}{N_f} \sum_{j=\max(p_i-30 \text{ kHz}, 30 \text{ kHz})}^{\min(p_i+30 \text{ kHz}, 110 \text{ kHz})} E_{ij} \quad (12)$$

where the step of  $j$  is equal to 0.5 kHz and, as a result,  $N_f = 2 \cdot (\min(p_i + 30 \text{ kHz}, 110 \text{ kHz}) - \max(p_i - 30 \text{ kHz}, 30 \text{ kHz}))$ , and  $p_i$  is the frequency of the peak energy at time frame  $i$ , i.e.  $p_i = \arg \max_j (E_{ij})$ .

Both criteria TT and FT are applied on each short-term frame  $i$  as follows: the threshold conditions require that the spectral energy is higher than 50 percent of the dynamic threshold computed in step 1 and that the maximum energy is larger than the mean spectral energy by a factor of 3.5. Let  $V$  be a sequence of frame-level vocalization decisions, i.e.  $V_i = 1$  if time frame  $i$  is part of a vocalization and  $V_i = 0$  if not (Figure 5A). Then the above rule can be expressed as follows:

$$V_i = \begin{cases} 1 & \text{if } (S_i > t \cdot T_i) \text{ AND } (P_i > f \cdot M_i), \text{ where } t = 0.5 \text{ and } f = 3.5 \\ 0 & \text{else} \end{cases} \quad (13)$$

Both factors  $t$  and  $f$  have been selected after experimentation and can be considered as configurable (see Section ).

After the twofold thresholding rule has been applied as described above, we apply a smoothing step. Specifically, after the sequence  $V$  of 1s and 0s occurs (Figure 5A), this sequence is smoothed using a moving average filter with a duration of 20 ms (Figure 5B), so that the neighborhood of the possible vocalization is taken into account:

$$F_i = \frac{\sum_{j=0}^{L-1} V_{i-j}}{L} \quad (14)$$

where  $L$  is the size of the filter. As a final step, if successive positive frames found in  $F$  are separated by  $<11$  ms, they are concatenated to form segments of mice vocalizations (Figure 5C). Vocalizations of duration  $<5$  msec, are filtered out, since practical evaluation showed that in most cases these are false positive detections.

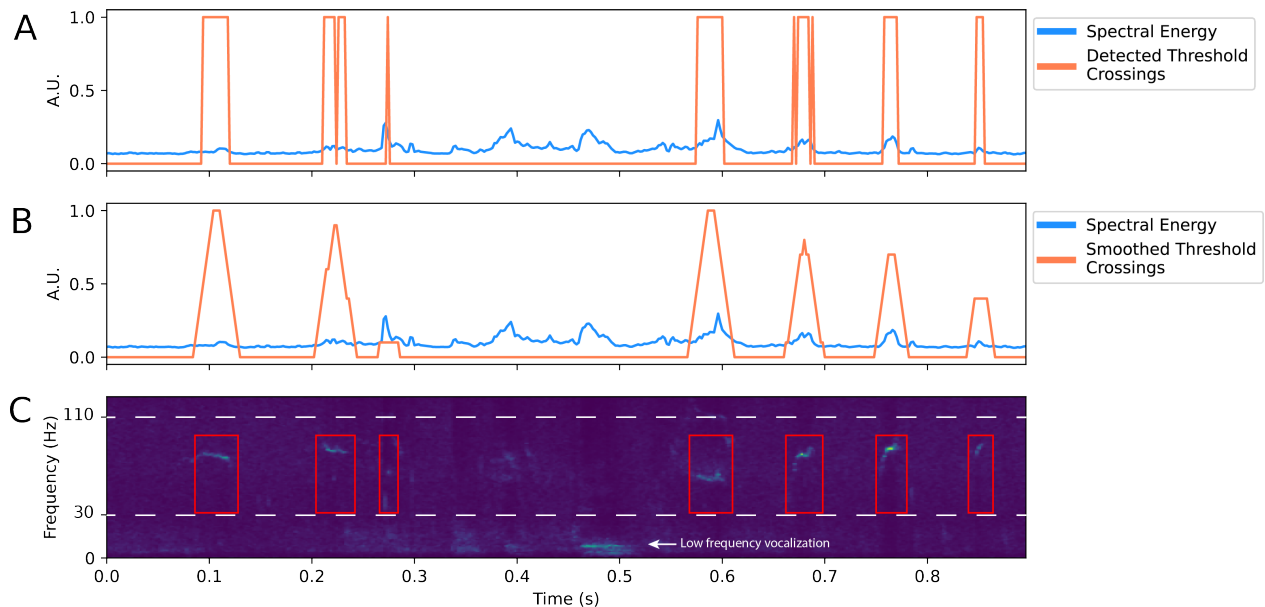

**Figure 5.** Detection by spectral energy threshold and smoothing. A) When spectral energy (blue) crosses a particular threshold the start and end of a vocalization is determined (orange). B) Threshold crossing is smoothed to determine final event and temporal detection (bottom). C) Representative spectrogram indicating where the USVs were detected based on threshold crossings. Dotted white line denotes 30-110kHz boundary used for detection.

### 357 Online USV Detection

358 In addition to the offline detection that is standard for most USV analyses, we also developed an online version of AMVOC (i.e. using  
359 streaming sound recorded from the computer's soundcard). This is achieved by following the aforementioned analysis steps, though  
360 these cannot be applied to the whole signal at once, since, in a real-time setup, the signal is recorded simultaneously with the detection  
361 procedure. For this process, we wanted the processing interval to be as small as possible, in order to detect the vocalizations fast. On  
362 the other hand, if we process the signal more often, the probability of cutting a vocalization in the border between two successive  
363 blocks is increased. Additionally, the signal statistics that need to be calculated for the detection steps described in the preceding  
364 section will become less robust if they are computed on smaller segments. We therefore chose to process the signal in blocks of a  
365 fixed duration, which for our case has been set equal to 750 ms. We estimated the number of USVs that could occur per processing  
366 window by running 20 recordings from live female and 20 recordings from female urine social contexts by processing the files with  
367 the online computations of AMVOC in an offline format. A 750ms window provides a long enough period for high accuracy detection  
368 and minimally interrupting the number of individual syllables that would be processed (Figure S1A and B). AMVOC requires about  
369 5ms to process a 750 ms window (Figure S1C). This processing time is independent of the number of USVs per window, and appears  
370 constant across tested files (Figure S1D and E). Since this processing time is less time than any inter-syllable interval (Figure S1F),  
371 this means that no USVs are lost to drop-out due to computational load or processing time.

372 The main algorithmic difference between the online and the offline detection is the calculation of the dynamic threshold. If we  
373 denote  $k$  as the current block, the dynamic threshold is the same for all frames belonging to that block and it is computed as follows:

$$T_k = 0.3 \frac{\sum_{j=1}^k B_j}{k} + 0.7 \cdot B_k \quad (15)$$

374 where  $B_k$  is the mean spectral energy of block  $k$  in the 30-110 KHz frequency range (as described in Section ). In simple terms,  
375 the block's threshold is computed as the weighted average of the mean of the spectral energies of the blocks recorded up to that  
376 point and the current block's spectral energy. The weights (0.3, 0.7) were chosen after extensive experimentation (Figure S2). The  
377 sequence of thresholds that occurs is then multiplied by the threshold percentage  $t$ , exactly as in the offline method (Section ). Another  
378 difference between the offline and the online methodologies is that for the online approach, we have selected to use an overlapping  
379 block. In particular, we always process the newest 750 ms recorded segment plus the last 100 ms of the previous block. In this way  
380 we add a minor computational delay (as we repeat the process for 13% of the data), and we manage to eliminate the errors caused by  
381 USVs being split between two successive blocks, and therefore lost by the detection method. The rest of the procedure is the same as  
382 the offline method and it is applied every 750 ms.

### 383 Vocalization Detection Configuration

384 As mentioned earlier, the two parameters which determine the vocalization detection procedure is the threshold percentage  $t$  and a  
385 factor  $f$ ; this would mean that energy of a 60 kHz area  $M_i$  around the frequency of peak energy  $p_i$  must surpass peak energy  $P_i$  by the  
386 factor  $f$ . The user can change these values according to the expected recording conditions and application requirements. Parameters  
387 used in our current study were optimized to include small events while minimizing false positives. To select these parameters, we used  
388 Dataset D1 (Figure 6). As expected, increasing either of these parameters results in a more strict thresholding, which means that the  
389 precision increases, and recall decreases. The opposite is observed when either of the parameters is reduced. From a more qualitative  
390 point of view, increasing the threshold might result in splitting a vocalization with relatively low peak energy in intermediate time  
391 frames. On the other hand, a very low threshold can merge successive vocalizations.

### 392 Deep unsupervised learning for mouse vocalization clustering

393 We next developed a method for unsupervised clustering of the detected vocalizations, by using a convolutional autoencoder, from  
394 which features are derived.

#### 395 Convolutional autoencoders

##### 396 Autoencoders

397 Autoencoders are neural networks that are trained to attempt to copy their input to their output. An autoencoder consists of 3  
398 components: encoder, code and decoder. The encoder compresses the input and produces the code, the decoder then reconstructs the  
399 input only using this code. The encoder is described by a function  $h = f(x)$ , where  $x$  is the input and  $h$  is the code and the decoder  
400 produces a reconstruction  $r = g(h)$ .

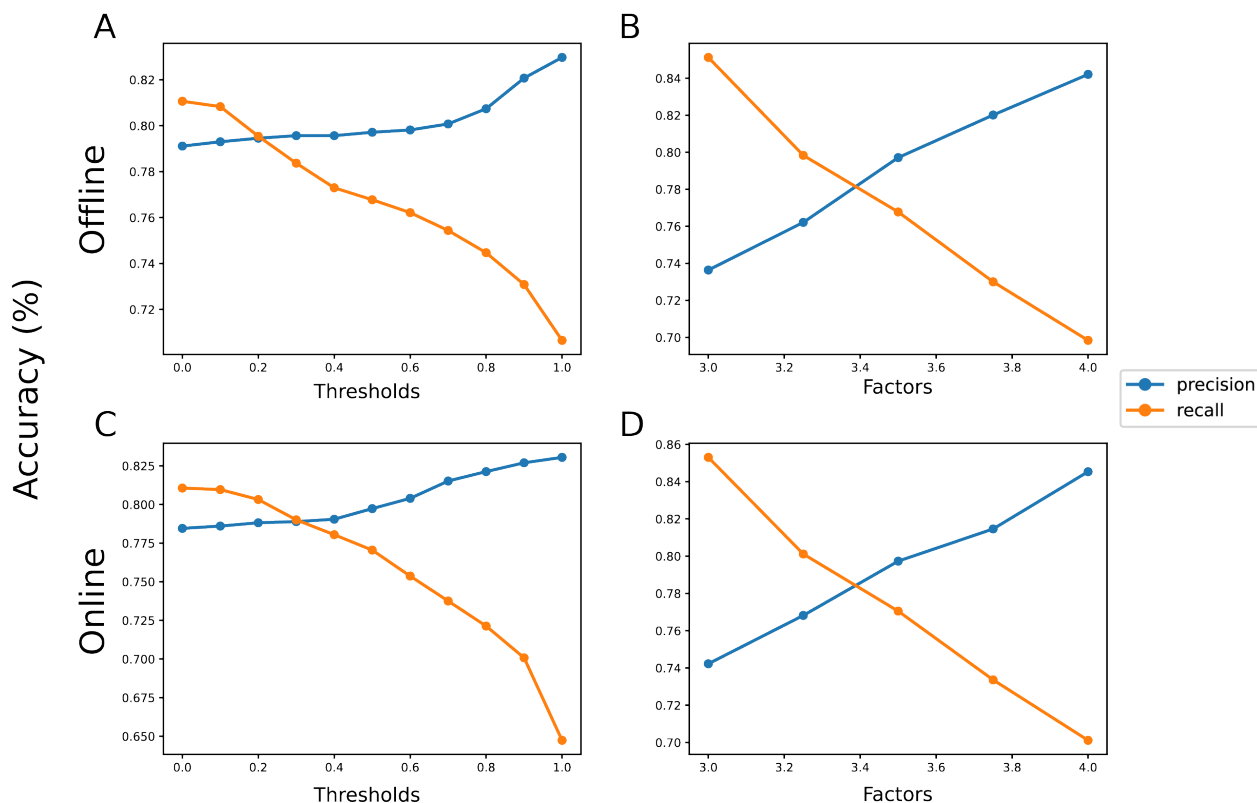

**Figure 6.** Effect of changing parameters on precision and recall. A and B) Changes in precision and recall during offline detection when thresholds  $t$  and factors  $f$  are changed. C and D) Changes in precision and recall during online detection when thresholds and factors are changed. Optimal threshold and factor were determined to be the same, 0.5 and 3.5, respectively, in both detection modes.

401 The encoder maps the input into a code that is assumed to contain the most important information (features) of the input, and then  
 402 decoder constructs the output from this representation. The intermediate representation of the input, is also called the latent-space  
 403 representation.

404 By training the autoencoder to perform the input copying task we hope that the code  $h$  will be an efficient representation of the  
 405 input and will contain important information from it. One way to obtain useful features from the autoencoder is to constrain  $h$  to  
 406 have a smaller dimension than  $x$ . An autoencoder whose code dimension is less than the input dimension is called undercomplete.  
 407 Learning an undercomplete representation forces the autoencoder to capture the most salient features of the training data. The learning  
 408 process is described simply as minimizing a loss function  $L(x, g(f(x)))$ , where  $L$  is a loss function penalizing  $g(f(x))$  for being  
 409 dissimilar from  $x$ .

410 Commonly, the encoder and the decoder are feedforward neural networks, whose task is to learn the function  $f$  and  $g$  respectively.  
 411 In our case, where the inputs are images, the encoder and the decoder are convolutional neural networks.

#### 412 Convolutional neural networks

413 CNNs are a kind of network that process data with a known grid-like topology, like image data. They are named after the mathematical  
 414 operation convolution, which they employ. Their fundamental characteristics, which we make use of, are:

- 415 • 2D convolution: The goal of a 2D convolution is to produce the activation map. More specifically, we have the input image and  
 416 a specific number of filters, which are kernels of fixed dimensions, e.g 3x3. Every filter corresponds to a unit of the network,  
 417 which is connected to a certain e.g. 3x3 area of the image (receptive field) and learns its features and properties. So, the 2D  
 418 convolution is responsible for learning the local characteristics of the image. Each kernel is convolved with the whole image  
 419 and produces a convolutional activation map. After the convolution, we will have activation maps of depth equal to the number  
 420 of the filters applied.
- 421 • Pooling: It is performed after each convolution and reduces the size of the activation maps. This procedure is important,



422 because the computational load of the next layers of the network is reduced, since the width and height of the convolutional  
423 activation maps is downsampled. This enables us to obtain a representation of the image which is scale-independent. By  
424 reducing the size of the image after every convolution, we ensure that the intermediate representation will indeed have lower  
425 dimensions compared to the initial image.

## 426 Applications

427 Autoencoders are powerful tools for dimensionality reduction or feature learning. Applications of undercomplete autoencoders  
428 include compression, recommendation systems as well as outlier detection. Convolutional autoencoders are frequently used in image  
429 compression and denoising. They may also be used in image search applications, since the hidden representation often carries  
430 semantic meaning. Recently, theoretical connections between autoencoders and latent variable models have brought autoencoders to  
431 the forefront of generative modeling. More specifically, the variational autoencoder is a generative model which can be trained and  
432 used to generate images (*Goodfellow et al., 2016*).

433 In our case, the purpose of adopting a convolutional autoencoder is to create meaningful feature extractors for the spectrograms  
434 that correspond to the detected mice vocalizations. The input of the autoencoder are the images (spectrogram parts) that contain a  
435 vocalization and our goal is to obtain an intermediate representation (code  $h$ ), in order to use it as a feature vector that will uniquely  
436 describe each image. From this representation, the image will be reconstructed in the decoder and the output will be compared to the  
437 input in each step, in order to calculate the loss function. The structure and the training of our autoencoder is described below.

## 438 Proposed autoencoder architecture and training

439 To train the autoencoder, we used Dataset D2 (see Section ) and we calculated the spectrogram for each of its recordings. This  
440 dataset contains 22,409 detected syllables. Each vocalization is represented by a spectrogram in the detected time interval and defined  
441 frequency range. Therefore, these spectrograms vary in width, which corresponds to the respective syllable duration. So, we have to  
442 specify the width of the images that we are going to feed to the autoencoder, since the frequency y axis is the same for all spectrograms:  
443 80 kHz range (from 30-110 kHz) and 0.5 kHz frequency resolution, resulting in a dimension of 160. Selecting a fix sized time  
444 dimension for our spectrograms requires taking into consideration a tradeoff between losing important information from the larger  
445 spectrograms (if we crop them) and reducing the importance of the shape and details of the smaller spectrograms (if we zero-pad  
446 them), which are more numerous than large spectrograms (Figure 7).

447 In order to decide the final fixed size of the spectrograms to feed the autoencoder, we plotted a histogram of the initial durations of  
448 all the detected syllables in the training set (Figure 7). To ensure uniform sizing, we zero padded small spectrograms, and cropped  
449 larger spectrograms keeping the central part of the image. Based on the histogram we selected a fix-sized duration of 64 windows since  
450 it is larger than both the mean and the median of the durations (Figure 7). Using this size, we noted that it balanced the information  
451 tradeoff mentioned above. It is also a power of 2, which is convenient for the pooling operations in the autoencoder. This length of  
452 64 frames corresponds to 64 time frames x 0.002 sec/time frame = 0.128 sec = 128 ms. The aforementioned process of cropping  
453 or expanding spectrograms to a fix-sized width of 64 windows leads to spectrograms of a final resolution of 64 time frames x 160  
454 frequency bins.

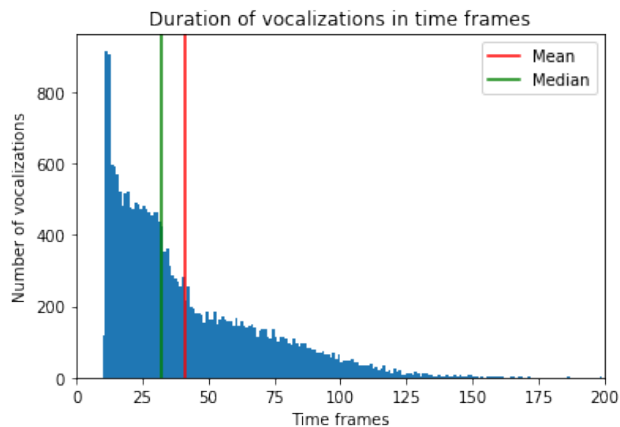

**Figure 7.** Histogram of the duration of the vocalizations in time frames Each time frame corresponds to a 2 ms duration.

455 The training set consists of 22,409 images, each one with size 64x160. We fed the images to the encoder, which is a convolutional  
456 neural network with 3 convolutional layers, each followed by a max pooling layer (Figure 8A). The first convolutional layer uses 64  
457 filters, with dimensions 3x3 each.

458 After that, a max pooling layer decreases the spatial dimensions of the images by a factor of 2. This means that the output of  
459 the max pooling layer is a 32x80x64 representation. The next convolutional layer consists of 32 filters, with a max pooling layer  
460 generating an output with dimensions 16x40x32. The third and final layer includes 8 filters, and a max pooling layer, resulting in a  
461 convolutional activation map for each image with dimensions 8x20x8. This flattened intermediate representation is the feature vector  
462 that uniquely describes the input image (i.e. the code).

463 In order for the convolutional encoder to be trained, and because the task is unsupervised, the second part of the autoencoder (the  
464 decoder) is responsible for reconstructing the image we fed to the encoder from the intermediate representation (Figure 8A). The  
465 decoder reverts the steps of the encoder, using 32, 64 and 1 filter in the last layer. In each decoder layer, we use filters of size 2x2 and  
466 a stride of 2, so that after each layer the size of the representation increases by 2 and the final output of the autoencoder is an image  
467 with the same size as the original input.

468 After each convolutional layer, the ReLU activation function is used, since we want the activation maps to consist of positive  
469 values. An exception is the last deconvolution of the decoder, where the Sigmoid activation function is necessary for the reconstruction  
470 of the image and the calculation of the Binary Cross Entropy Loss function, as it outputs a value between zero and one.

$$R(z) = \max(0, z) \quad (16)$$

$$\sigma(z) = \frac{1}{1 + e^{-z}} \quad (17)$$

471 The loss function is calculated based on the differences between the reconstructed and the original image. This loss function  
472 indicates the quality of the autoencoder's performance, and can be improved with increased training epochs. If we denote the output  
473 of the decoder at a specific pixel as  $\hat{y}$  and the actual value of the input image as  $y$ , then Binary Cross Entropy Loss is calculated as:

$$L(y, \hat{y}) = -y \cdot \log(\hat{y}) - (1 - y) \cdot \log(1 - \hat{y}) \quad (18)$$

#### 474 Parameter tuning

475 As described above, the basic parameters for configuring our proposed autoencoder procedure are the following:

- 476 • *Number of layers of the encoder.* We tested a range of different numbers of layers (2-4 layers). Using 2 layers appeared  
477 problematic, since the autoencoder couldn't clearly reconstruct input images. Four layers or more result in too many parameters,  
478 which slowed down the training, resulting in a bigger loss, while the final reconstruction wasn't better than the one obtained  
479 from a 3-layer autoencoder (Figure S3A).
- 480 • *Number of filters per layer* We used the most filters in the first layers (as is typical for classical neural networks), and reduced  
481 the number of filters as we went deeper in the network. We tested the autoencoder with varying numbers of layers. Fewer filters  
482 resulted in losing information from the images, while more resulted in too many parameters to be trained. The critical choice  
483 we had to make was the number of filters in the last encoder layer, the output of which we use as the representation for the  
484 specific image in the clustering task. We tested 2, 4 and 8 filters. Using 8 filters resulted in smaller loss, as expected, although  
485 using 4 filters were enough for the reconstruction of the images (Figure 8C), meaning enough features for the reconstruction  
486 were extracted with fewer filters. We selected 8 filters in our final design in order to ensure that all the details of the various  
487 shapes of the vocalizations are properly extracted.
- 488 • *Filter size* We experimented with 3x3, 5x5 and 3x5 kernels. A 3x5 kernel appeared reasonable because of the non-square shape  
489 of the images, but gave similar results to 3x3 kernels, so we selected the latter, since symmetric kernels are more commonly  
490 used (Figure S3B).
- 491 • *Size of max pooling kernels* We experimented with reducing the image size by 2 in both dimensions, or by 2 in time dimension  
492 and by 4 in frequency dimension due to the non-square image. A 2x symmetrical reduction provided better results (Figure S3C).

493 As far as other hyperparameters are concerned, we used the Adam optimizer, with learning rate equal to 0.001 and batch size  
494 equal to 32.

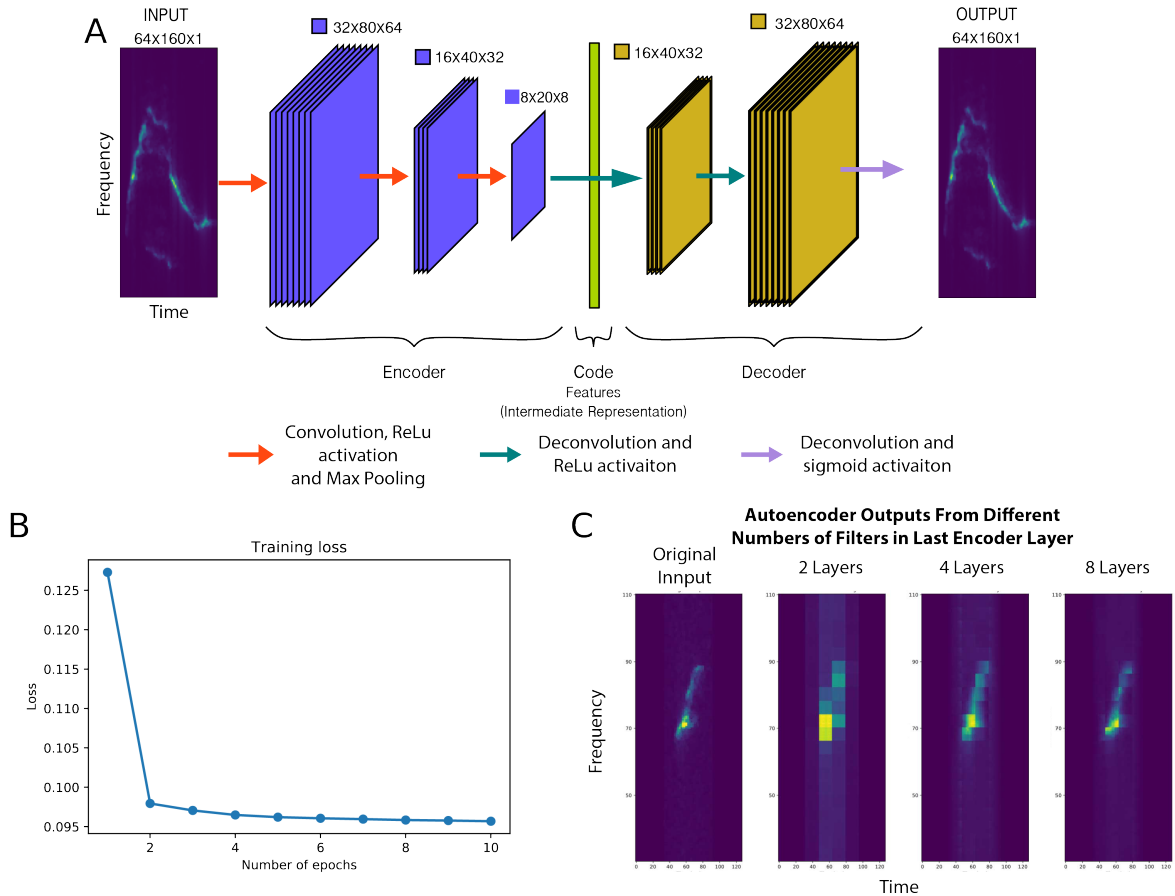

**Figure 8.** AMVOC convolutional autoencoder A) Architecture used for the autoencoder in AMVOC. B) Effect of the number of training epochs on measured training loss. C) Examples of image reconstruction with AMVOC’s autoencoder after training, using 2, 4 and 8 filters in the encoder output layer. Data is extracted from the input image (left) and used to reconstruct the three images (right).

495 Training epochs were determined experimentally. We found that 2 or 3 epochs was enough for a good reconstruction of the  
 496 images, as loss did not decrease much after 3 epochs (Figure 8B). We also did not want to overfit to the training data. Thus, we elected  
 497 to train the model for just 2 epochs.

498 An example of the input and output of the autoencoder is shown in Figure 8C. The input comes from a recording that was not  
 499 used in the training Dataset D2. The reconstruction is lossy, due to our use of an undercomplete autoencoder.

#### 500 Feature extraction and clustering

501 After the model has been trained in the unsupervised manner described above, it is ready to be used in the feature extraction procedure  
 502 (Figure 2A). An audio file is selected and its spectrogram is calculated, and individual USVs are detected. The raw spectrograms of  
 503 the USVs are fed to the autoencoder in batches of 32 and the intermediate representations are derived. These are the feature vectors.  
 504 Each flattened feature vector has a dimension of 1,280 (8x20x8) after a dimensionality reduction from a dimension of 10,240 in the  
 505 initial flattened vector, since each image started with a shape of 64x160.

506 After the features are extracted, we further reduced the dimensions by excluding features that have the smallest variance and will  
 507 likely be less impactful for the discrimination of USVs. After extensive qualitative experimentation, assuming we have  $N$ -dimensional  
 508 feature vectors, we selected a threshold equal to:

$$v_t = 1.2 \cdot \frac{1}{N} \sum_{j=1}^N \sigma_j^2 \quad (19)$$

509 where  $\sigma_j^2$  is the variance of feature  $j$ . In this case,  $v_t$  is the mean of the features’ variances; features with variance less than  $v_t$  will

510 be excluded, resulting in feature vectors undergoing a dimensionality reduction of a factor approximately equal to 4.

511 Next, we normalize the features using a Standard Scaler. Each feature is scaled according to the following equation:

$$X_{transformed} = \frac{X - X_{mean}}{X_{std}} \quad (20)$$

512 where  $X_{mean}$  is the mean of the feature values for all samples and  $X_{std}$  is the standard deviation of the feature values for all samples.

513 In the last preprocessing step, we used PCA to further reduce the dimensionality of the feature vectors. Since we do not know  
514 the number of components beforehand, we choose the smallest number of components which maintains 95% of the variance of the  
515 features before the PCA. Overall, our goal was to both extract many features from the images using the encoder, so that details of  
516 the images are taken into account, and simultaneously reduce them as much as possible by ignoring the non-significant features.  
517 This final reduced feature representation is then used for clustering. The final visualized cluster is plotted as a 2-dimensional tSNE  
518 reduction of the data (Figure 2B).

519 Each cluster should consist of vocalizations that share some common features that allow them to belong in the same group.  
520 Since we wanted the user to be able to choose the number of clusters, we chose clustering algorithms that can have this parameter  
521 predefined. Users can choose between the following clustering methods: Agglomerative, Birch, Gaussian Mixture Models, K-Means  
522 and Mini-Batch K-Means. In the implemented GUI (see Section ), the user can choose one of these clustering methods and the  
523 number of clusters, in a range from 2 to 10.

## 524 Baseline feature extraction

525 To evaluate the quality of AMVOC's deep feature extraction and clustering, we compared clustering on deep features against clusters  
526 derived from hand-picked acoustic parameters (Figure 3A). The hand-picked features were measured as follows:

- 527 1. We first calculate the spectrogram in the specific time segment that corresponds to the vocalization and in the defined frequency  
528 range (30-110 kHz).
- 529 2. We then perform frequency contour detection:

- 530 • Detect the position and the value of the peak energy in each time frame. If we denote the spectrogram value at time frame  
531  $i$  and frequency  $j$  as  $E_{ij}$ , the equations describing the two quantities above, are the following:

$$p_i = \arg \max_{j=30, \dots, 110 \text{ kHz}} E_{ij} \quad (21)$$

532

$$P_i = \max_{j=30, \dots, 110 \text{ kHz}} E_{ij} \quad (22)$$

- 533 • Use a thresholding condition to keep only the points  $i$  where the peak energy is higher than 20 % of the highest energy  
534 value in the specific time interval:

$$\text{if } P_i > t \cdot \max_i P_i, \text{ where } t = 0.2, \text{ keep point } (i, p_i) \quad (23)$$

- 535 • Train a regression SVM to map time coordinates to frequency values, using the chosen points  $(i, p_i)$  as training data.
- 536 • Predict the frequencies for the same time range. After that, for each vocalization, a frequency contour  $c$  is created, along  
537 with a corresponding time vector  $v$ , which matches every frame  $i$  to its actual time of occurrence. This estimated sequence  
538  $c$  captures the "most dominant" frequency in each time frame, so we can think of it as a spectral shape sequence of each  
539 mice vocalization.

- 540 3. After the frequency contour  $c$  is produced, we proceed to the feature extraction step. We selected 4 different features, all based  
541 on the frequency contour:

- 542 • Duration of the vocalization  $d$ . If we denote the number of frames of which the vocalization consists as  $N$ :

$$f_1 = d = v[N - 1] - v[0] \quad (24)$$

- 543 • Time position of the minimum frequency (of the predicted frequencies), normalized by the duration of the vocalization:

$$f_2 = \frac{v[\arg \min_{i=0, \dots, N-1} c_i] - v[0]}{d} \quad (25)$$

- 544 • Time position of the maximum frequency (of the predicted frequencies), normalized by the duration of the vocalization:

$$f_3 = \frac{v[\arg \max_{i=0, \dots, N-1} c_i] - v[0]}{d} \quad (26)$$

- 545 • Bandwidth is calculated as the difference between the first and the last predicted frequency value, normalized by the mean  
546 frequency of the vocalization  $m_f$ :

$$f_4 = \frac{c_{N-1} - c_0}{m_f}, \text{ where } m_f = \frac{\sum_{i=0}^{N-1} (c_i)}{N} \quad (27)$$

547 If we interpret the frequency contour as a 2-dimensional graph, where the x-axis corresponds to time and the y-axis to frequency, the  
548 2nd feature is the x-position of the minimum of the curve, the 3rd feature is the x-position of the maximum of the curve and the 4th  
549 feature is the normalized difference between y-positions of first and last point. For example, the last feature can discriminate contours  
550 with different slopes. After the features are extracted, we scale them using a Standard Scaler (see Equation 20).

### 551 **Implementation and library description**

552 The functionalities described throughout the paper were implemented in Python 3.8. The code can be found in the repository  
553 [https://github.com/tyiannak/amvoc/tree/master/data/vocalizations\\_evaluation](https://github.com/tyiannak/amvoc/tree/master/data/vocalizations_evaluation). For the implementation of the autoencoder  
554 we used the Pytorch deep learning framework, and we used the clustering algorithms implementations from Scikit-Learn. The  
555 visualization of the data in the offline mode, including the clustering, specific vocalizations, and the evaluation choices are all displayed  
556 and accessible in the Dash GUI.

### 557 **Acknowledgements**

558 We thank E. Waidmann, R. Agravat, and other members of the Jarvis lab for their thoughtful conversations on this project. We thank  
559 J. Chabout for providing open access to his past mouse recordings.

### 560 **Funding**

561 This project was funded by the Howard Hughes Medical Institute and Rockefeller University start-up funds to EDJ, a Kavli NSI Pilot  
562 Grant to CDMV. CDMV is a Howard Hughes Medical Institute Gilliam Fellow.

### 563 **Notes on contributor(s)**

564 VS, CDMV, PFS, and TG co-wrote the paper, and EDJ edited the paper. VS and TG wrote the code for AMVOC. PFS developed MSA2.  
565 VS, CDMV, and TG contributed to analyses. CDMV performed vocal behavior experiments and tests. TG and EDJ co-supervised the  
566 study.

### 567 **References**

- 568 **Arriaga G**, Zhou EP, Jarvis ED. Of mice, birds, and men: the mouse ultrasonic song system has some features similar to humans and song-learning  
569 birds. *PLoS one*. 2012; 7(10):e46610.
- 570 **Bowers JM**, Perez-Pouchoulen M, Edwards NS, McCarthy MM. Foxp2 mediates sex differences in ultrasonic vocalization by rat pups and directs  
571 order of maternal retrieval. *Journal of Neuroscience*. 2013; 33(8):3276–3283.
- 572 **Calbick D**, Castellucci GA, McCormick DA. Differential temporal structures in mouse ultrasonic vocalizations relay sex and age information about  
573 the producer. *The Journal of the Acoustical Society of America*. 2017; 141(5):3946–3946.
- 574 **Castellucci GA**, Calbick D, McCormick D. The temporal organization of mouse ultrasonic vocalizations. *PLoS one*. 2018; 13(10):e0199929.
- 575 **Castellucci GA**, McGinley MJ, McCormick DA. Knockout of Foxp2 disrupts vocal development in mice. *Scientific Reports*. 2016 mar; 6(1). doi:  
576 10.1038/srep23305.
- 577 **Chabout J**, Jones-Macopson J, Jarvis ED. Eliciting and analyzing male mouse ultrasonic vocalization (USV) songs. *Journal of visualized experiments:*  
578 *JoVE*. 2017; (123).
- 579 **Chabout J**, Sarkar A, Dunson DB, Jarvis ED. Male mice song syntax depends on social contexts and influences female preferences. *Frontiers in*  
580 *behavioral neuroscience*. 2015; 9:76.

- 581 **Chabout J**, Sarkar A, Patel SR, Radden T, Dunson DB, Fisher SE, Jarvis ED. A Foxp2 mutation implicated in human speech deficits alters sequencing  
582 of ultrasonic vocalizations in adult male mice. *Frontiers in behavioral neuroscience*. 2016; 10:197.
- 583 **Coffey KR**, Marx RG, Neumaier JF. DeepSqueak: a deep learning-based system for detection and analysis of ultrasonic vocalizations. *Neuropsychopharmacology*. 2019; 44(5):859–868.
- 585 **Datta SR**, Anderson DJ, Branson K, Perona P, Leifer A. Computational neuroethology: a call to action. *Neuron*. 2019; 104(1):11–24.
- 586 **Fonseca AH**, Santana GM, Bosque Ortiz GM, Bampi S, Dietrich MO. Analysis of ultrasonic vocalizations from mice using computer vision and  
587 machine learning. *eLife*. 2021 mar; 10:e59161. doi: 10.7554/eLife.59161.
- 588 **Gal A**, Saragosti J, Kronauer DJ. anTraX, a software package for high-throughput video tracking of color-tagged insects. *Elife*. 2020; 9:e58145.
- 589 **Gao SC**, Wei YC, Wang SR, Xu XH. Medial preoptic area modulates courtship ultrasonic vocalization in adult male mice. *Neuroscience bulletin*.  
590 2019; 35(4):697–708.
- 591 **Goffinet J**, Brudner S, Mooney R, Pearson J. Low-dimensional learned feature spaces quantify individual and group differences in vocal repertoires.  
592 bioRxiv. 2021; p. 811661.
- 593 **Goodfellow I**, Bengio Y, Courville A. *Deep Learning*. MIT Press; 2016. <http://www.deeplearningbook.org>.
- 594 **Grimsley JM**, Monaghan JJ, Wenstrup JJ. Development of social vocalizations in mice. *PLoS one*. 2011; 6(3):e17460.
- 595 **Hausmann SB**, Vargas AM, Mathis A, Mathis MW. Measuring and modeling the motor system with machine learning. arXiv preprint arXiv:210311775.  
596 2021; .
- 597 **Hertz S**, Weiner B, Perets N, London M. Temporal structure of mouse courtship vocalizations facilitates syllable labeling. *Communications biology*.  
598 2020; 3(1):1–13.
- 599 **Holy TE**, Guo Z. Ultrasonic songs of male mice. *PLoS Biol*. 2005; 3(12):e386.
- 600 **Hsu AI**, Yttri EA. An Open Source Unsupervised Algorithm for Identification and Fast Prediction of Behaviors. bioRxiv. 2021; p. 770271.
- 601 **Jones JM**, Foster W, Twomey CR, Burdge J, Ahmed OM, Pereira TD, Wojcik JA, Corder G, Plotkin JB, Abdus-Saboor I. A machine-vision approach  
602 for automated pain measurement at millisecond timescales. *Elife*. 2020; 9:e57258.
- 603 **Kabra M**, Robie AA, Rivera-Alba M, Branson S, Branson K. JAABA: interactive machine learning for automatic annotation of animal behavior.  
604 *Nature methods*. 2013; 10(1):64.
- 605 **Kane GA**, Lopes G, Saunders JL, Mathis A, Mathis MW. Real-time, low-latency closed-loop feedback using markerless posture tracking. *Elife*. 2020;  
606 9:e61909.
- 607 **Liu RC**, Miller KD, Merzenich MM, Schreiner CE. Acoustic variability and distinguishability among mouse ultrasound vocalizations. *The Journal of*  
608 *the Acoustical Society of America*. 2003; 114(6):3412–3422.
- 609 **Marshall JD**, Aldarondo DE, Dunn TW, Wang WL, Berman GJ, Ölveczky BP. Continuous whole-body 3D kinematic recordings across the rodent  
610 behavioral repertoire. *Neuron*. 2021; 109(3):420–437.
- 611 **Mathis A**, Mamidanna P, Cury KM, Abe T, Murthy VN, Mathis MW, Bethge M. DeepLabCut: markerless pose estimation of user-defined body parts  
612 with deep learning. *Nature neuroscience*. 2018; 21(9):1281–1289.
- 613 **Melotti L**, Siestrup S, Peng M, Vitali V, Dowling D, Sachser N, Kaiser S, Richter SH. Individuality, as well as genotype, affects characteristics and  
614 temporal consistency of courtship songs in male mice. bioRxiv. 2021; .
- 615 **Michael V**, Goffinet J, Pearson J, Wang F, Tschida K, Mooney R. Circuit and synaptic organization of forebrain-to-midbrain pathways that promote  
616 and suppress vocalization. *Elife*. 2020; 9:e63493.
- 617 **Neilans EG**, Holfoth DP, Radziwon KE, Portfors CV, Dent ML. Discrimination of ultrasonic vocalizations by CBA/CaJ mice (*Mus musculus*) is  
618 related to spectrotemporal dissimilarity of vocalizations. *PLoS one*. 2014; 9(1):e85405.
- 619 **Neunuebel JP**, Taylor AL, Arthur BJ, Egnor SR. Female mice ultrasonically interact with males during courtship displays. *eLife*. 2015 may; 4. doi:  
620 10.7554/elife.06203.
- 621 **Okobi DE**, Banerjee A, Matheson AM, Phelps SM, Long MA. Motor cortical control of vocal interaction in neotropical singing mice. *Science*. 2019;  
622 363(6430):983–988.
- 623 **Perrodin C**, Verzat C, Bendor D. Courtship behaviour reveals temporal regularity is a critical social cue in mouse communication. *BioRxiv*. 2020; .



- 624 **Pomerantz SM**, Nunez AA, Bean NJ. Female behavior is affected by male ultrasonic vocalizations in house mice. *Physiology & behavior*. 1983;  
625 31(1):91–96.
- 626 **Scattoni ML**, Crawley J, Ricceri L. Ultrasonic vocalizations: a tool for behavioural phenotyping of mouse models of neurodevelopmental disorders.  
627 *Neuroscience & Biobehavioral Reviews*. 2009; 33(4):508–515.
- 628 **Steinfath E**, Palacios A, Rottschäfer J, Yuezak D, Clemens J. Fast and accurate annotation of acoustic signals with deep neural networks. . 2021 mar;  
629 <https://doi.org/10.1101/2021.03.26.436927>, doi: 10.1101/2021.03.26.436927.
- 630 **Tabler JM**, Rigney MM, Berman GJ, Gopalakrishnan S, Heude E, Al-Lami HA, Yannakoudakis BZ, Fitch RD, Carter C, Vokes S, et al. Cilia-mediated  
631 Hedgehog signaling controls form and function in the mammalian larynx. *Elife*. 2017; 6:e19153.
- 632 **Tachibana RO**, Kanno K, Okabe S, Kobayasi KI, Okanoya K. USVSEG: A robust method for segmentation of ultrasonic vocalizations in rodents.  
633 *PLOS ONE*. 2020 feb; 15(2):e0228907. doi: 10.1371/journal.pone.0228907.
- 634 **Torquet N**, De Chaumont F, Faure P, Bourgeron T, Ey E. mouseTube—a database to collaboratively unravel mouse ultrasonic communication.  
635 *F1000Research*. 2016; 5.
- 636 **Tschida K**, Michael V, Takatoh J, Han BX, Zhao S, Sakurai K, Mooney R, Wang F. A specialized neural circuit gates social vocalizations in the  
637 mouse. *Neuron*. 2019; 103(3):459–472.
- 638 **Van Segbroeck M**, Knoll AT, Levitt P, Narayanan S. MUPET—mouse ultrasonic profile extraction: a signal processing tool for rapid and unsupervised  
639 analysis of ultrasonic vocalizations. *Neuron*. 2017; 94(3):465–485.
- 640 **von Ziegler L**, Sturman O, Bohacek J. Big behavior: challenges and opportunities in a new era of deep behavior profiling. *Neuropsychopharmacology*.  
641 2021; 46(1):33–44.
- 642 **Zimmer MR**, Fonseca AH, Iyilikci O, Dai Pra R, Dietrich MO. Functional ontogeny of hypothalamic *AgRP* neurons in neonatal mouse behaviors.  
643 *Cell*. 2019; 178(1):44–59.

644 **Supplementary Material**

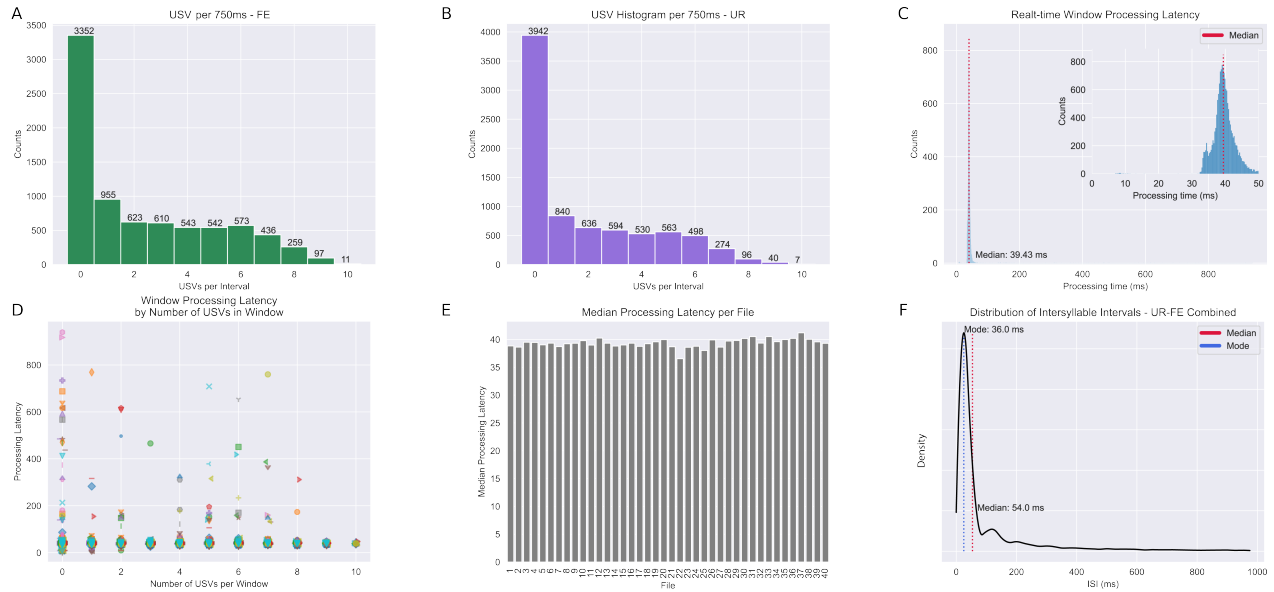

**Figure S1.** Frequency histograms from real-time processing windows. A) Number of USVs per 750ms non-overlapping segment from 20 recordings of male mice in a live female context. B) Number of USVs per 750ms non-overlapping segment from 20 recordings of male mice in a female urine context. C) Processing time required for each 750ms segment, mean and median are less than 250 $\mu$ s. Inset represents bins from 0-10ms of processing latency. Dashed line indicates median processing time. D) processing latency per number of USVs in a 750ms window. Symbols represent windows within a file. E) Median processing latency of all windows in tested files. F) Distribution of inter syllable intervals among USVs detected in test files.

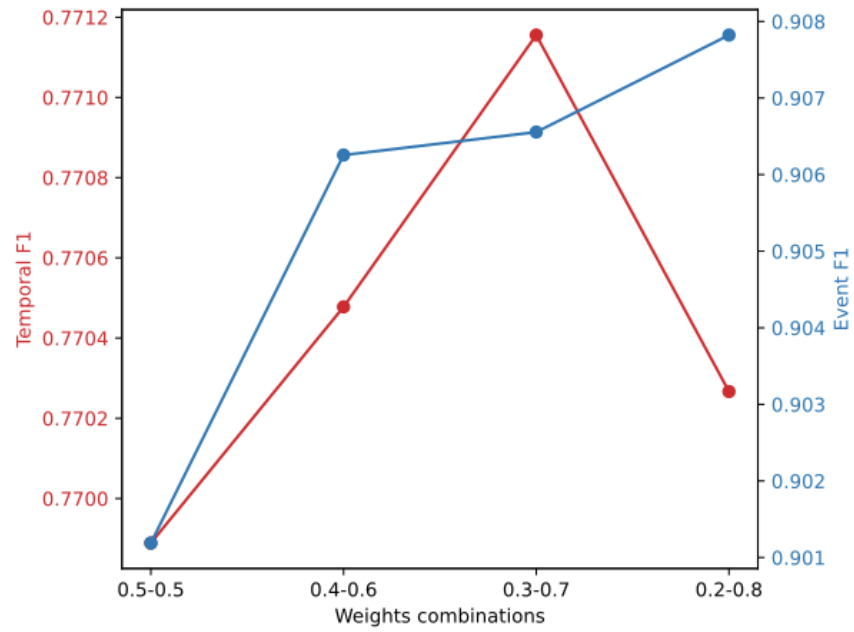

**Figure S2.** Effect of different weight combinations on Temporal and Event F1 Scores) Temporal (red) and event (blue) accuracy of USVs from our ground truth dataset using different combinations of weights.

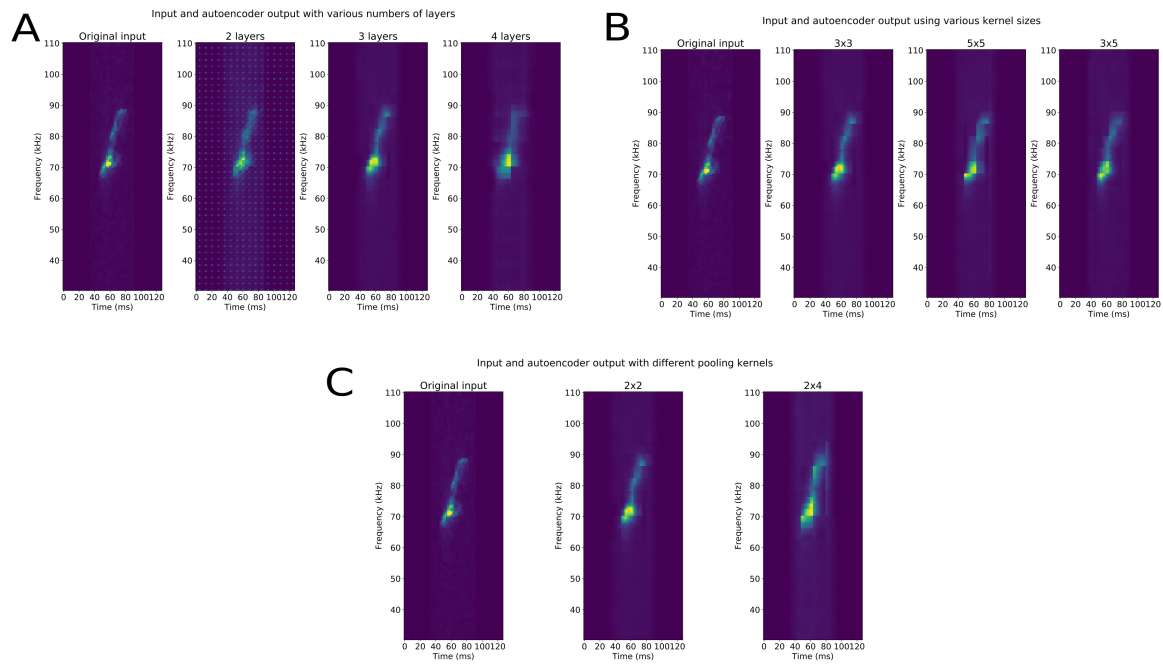

**Figure S3.** Effect of parameter tuning on the convolutional autoencoder reconstructions. Effect of changing A) different numbers of convolutional layers, B) kernel sizes, and C) pooling kernel sizes
